# Supplementary material for: SARS-CoV-2 neutralizing human recombinant antibodies selected from pre-pandemic healthy donors binding at RBD-ACE2 interface
Source: PubMed Central journal article supplement (PMC7952403; doi:10.1038/s41467-021-21609-2), 2021-03-11
Supplement: 41467_2021_21609_MOESM1_ESM.pdf [file 41467_2021_21609_MOESM1_ESM.pdf]

## Supplementary Information

SARS-CoV-2 neutralizing human recombinant antibodies selected from pre-pandemic healthy donors binding at RBD-ACE2 interface

Bertoglio *et al.*

**Supplementary Figure 1** Schematic overview of the expressed variants of the Spike SARS-CoV-2 protein.

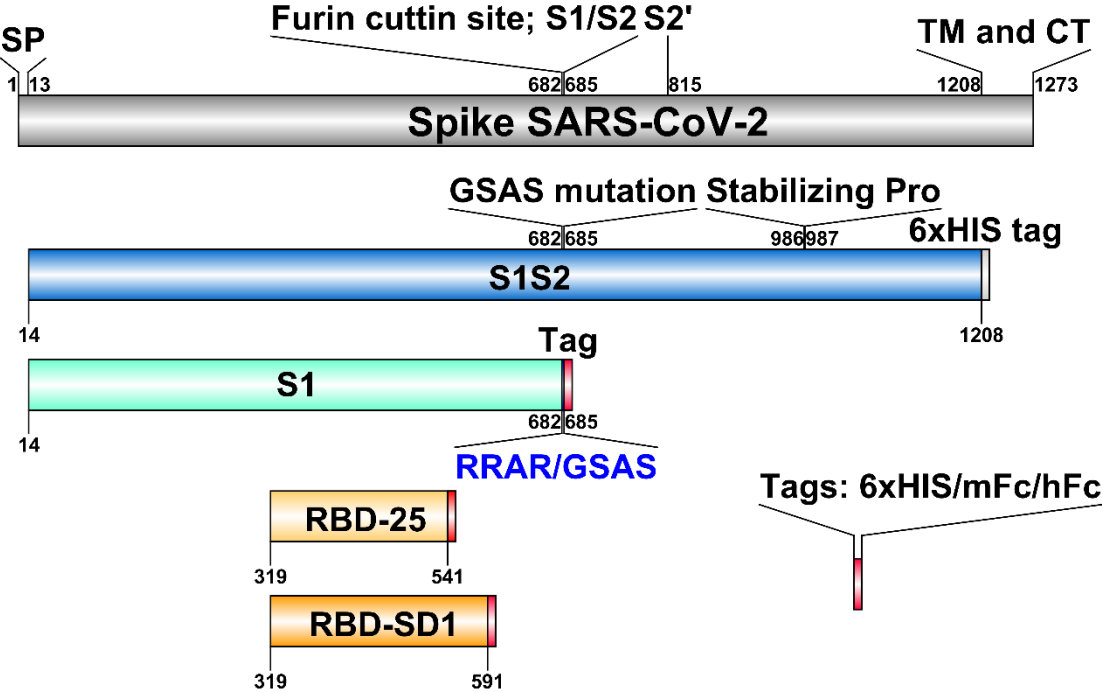

**Supplementary Figure 2** SEC data of antigen produced in insect High Five cells (A-C) and mammalian Expi293F cells (D-E). The table (F) indicates the most likely conformation of the protein due to the retention volume of the peaks with the corresponding area in percentage. (\*Furin site is present). Data shows a representative of two measurements.

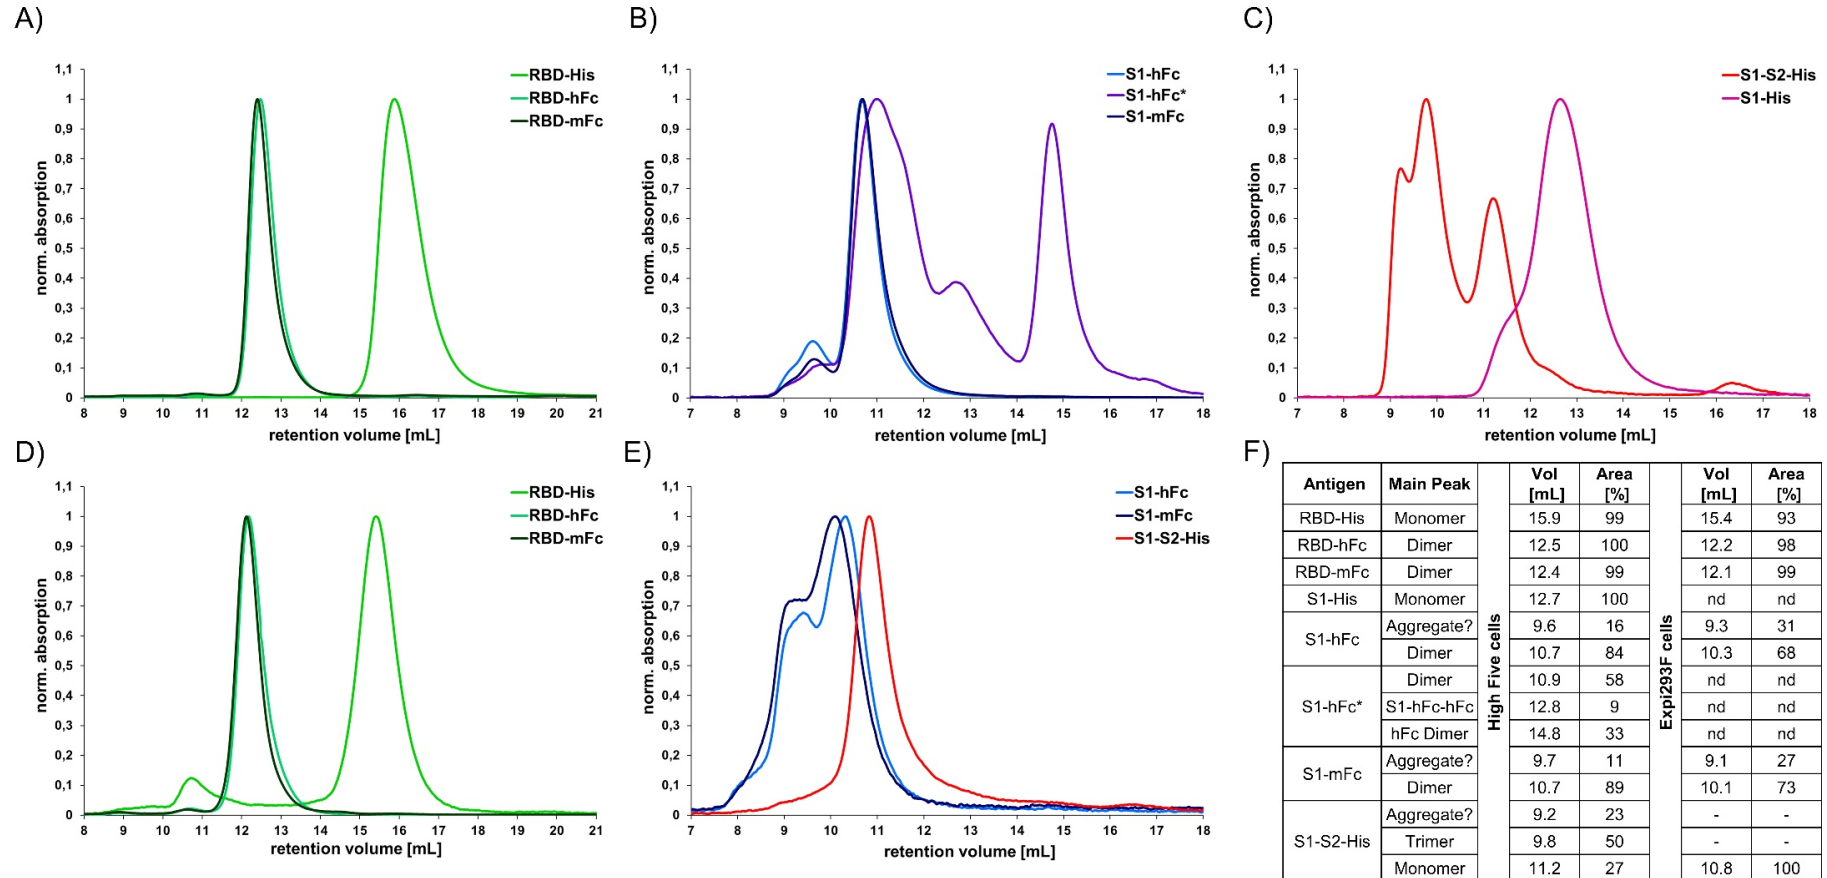

**Supplementary Figure 3** Flow cytometry inhibition analysis A) Gating strategy B) Analysis of spike S1-S2 trimer (50 nM in relation to monomer) binding to living cells expressing ACE2 blocked by 1500 nM antibodies and C) of RBD-mFc (10 nM in relation to monomer) binding to living cells expressing ACE2 blocked by 100 nM antibody. The antibodies STE72-1G5, STE72-4C10, STE72-8E1 and STE73-6C8 were used as example. The background control are transfected ACE2 cells and the reference are ACE2 positive cells incubated with labeled spike protein. Data shows a representative of the flow cytometry inhibition experiments.

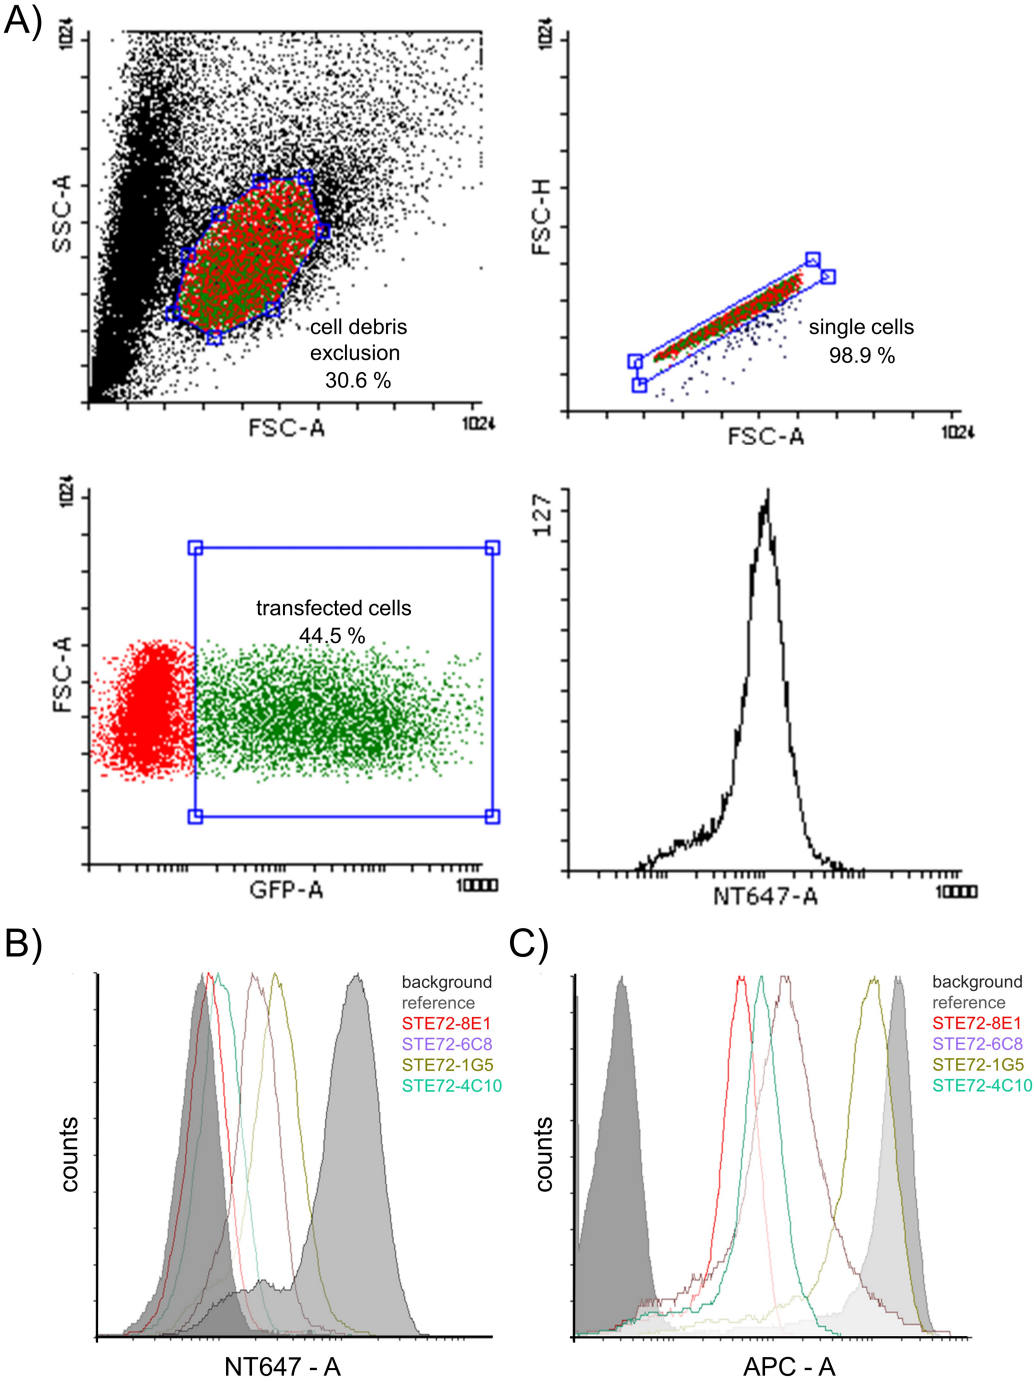

**Supplementary Figure 4** VH and VL V-genes of 17 inhibiting and neutralizing scFv-Fc. The CDRs are given according to the IMGT nomenclature (<http://www.imgt.org/IMGTScientificChart/Numbering/IMGTIGVLSuperfamily.html>) using VBASE2 ([www.vbase2.org](http://www.vbase2.org)).

| Antibody name     | VH amino acid sequence<br>CDR1, CDR2, CDR3                                                                                         | VL amino acid sequence<br>CDR1, CDR2, CDR3                                                                              |
|-------------------|------------------------------------------------------------------------------------------------------------------------------------|-------------------------------------------------------------------------------------------------------------------------|
| <b>STE70-1E12</b> | QMQLVQSGAEVKKPGASVKVSCASGYTFTGYMHWVRQAP<br>GQGLEWMGRINPNSGGTNYAQKFQGRVTMTRDTSTSTAYME<br>LSRLRSDDTAVYYCVRDGYNFNNWFDPWGQGLTVTVSS     | NFMLTQPHSVSGSPGETITISCTGSGGSIASNYVQWYRQRP<br>GSAPTIVIIYEDTQRPSGVPDRFSGSIDSSNSASLTISGLK<br>TEDEADYYCQSSESTNHVMFGGGSKLTVL |
| <b>STE72-1B6</b>  | QVKLVQSGGGLVQPGGSLRLSCAASGFTFSSYAMSWVRQAP<br>GKGLEWVSGISGSGGSTYYADSVKGRFTISRDNKNTLYLQ<br>VNSLRAEDTAVYYCAKAPYGDFRGLWYFDYWGQGLTVTVSS | DIVMTQSPFSVSASVGDRVTISCRASQDIRSWLAWYQQKPG<br>KAPQLLIYDASSLQSGVPSRFSGSGSGTDFTLTISLQPED<br>FATYYCQQADSVPLTFGGGTKVEIQ      |
| <b>STE72-1G5</b>  | QVQLVQSGAEVKKPGASVKVSCASGGTFSSYAI SWVRQAP<br>GQGLEWMGGIIPIFGTANYAQKFQGRVTITADESTSTAYME<br>LSSLRSED TAVYYCAVGGVQLWLTYYWGQGLTVTVSS   | ETTLTQSPGALSLSLSPGERATLSCRVSQSLSSNSLAWYQQKP<br>GQAPRLLIYDTSIRATGIPDRFSGSGSGTDFTLTISRLEPE<br>DFAVYYCHKYGSWPRTFGQGTKVEV   |
| <b>STE72-4C10</b> | EVQLQESGGGVVQPGRSLRLSCAASGFTFSSYAMHWVRQAP<br>GKGLEWVAVISYDGSNKYYADSVKGRFTISRDNKNTLYLQ<br>MNSLRAEDTAVYYCAREYSSSWYGLGAFDIWGQGMVTVSS  | DIRLTQSPSSLSASVGDRVTITCRASQNIHYYLNWYQQKPG<br>KAPSLLVYGASSLQSGVPSRFSGSGSGTEYTLTISLQPED<br>FATYFCQQSFKSPATFGQGTKVDIK      |
| <b>STE72-4E12</b> | QVQLVQSGAEVKKPGASVKVSCASGYTFTSYMHWVRQAP<br>GQGLEWMGIINPSSGGSTSYAQKFQGRVTMTRDTSTSTVYME<br>LSSLRSED TAVYYCARDLSGGLDYWGQGLTVTVSS      | ETTLTQSPATLSVSPGERVTLACRAGQTISSKLAWYRQKPG<br>QAPSLLIYDASTRATGVPARFSGSGSGTEFTLTISLQSED<br>FAVYYCQQYSDWPPTFGQGTKVEIK      |
| <b>STE72-8A2</b>  | QVQLVQSGAEVKKPGASVKVSCASGYTFTSYGISWVRQAP<br>GQGLEWMGWISAYNGNTNYAQKLQGRVTMTTDTSTSTAYME<br>LRSLRSDDTAVYYCARFFYDSSGYSTDYWGQGLTVTVSS   | DIRLTQSPSSLSASVGDRVTITCQASQDISNYLNWYQQKPG<br>KAPKLLIYDASNLETGVPDRFSGSGSGTDFTFTISLQPED<br>IATYYCQQYDNLPRTFGGGTKVEIK      |
| <b>STE72-8A6</b>  | QVQLVQSGAEVKKPGASVKVSCASGYTFTSYGISWVRQAP<br>GQGLEWMGWISAYNGNTNYAQKLQGRVTMTTDTSTSTAYME<br>LRSLRSDDTAVYYCARFFYDSSGYSTDYWGQGLTVTVSS   | DIVMTQSPSTLSASVGDRVTISCRASQNIQTLAWYQQKPG<br>KAPKLLISKASSLESVPSRFSGSGSGTDFTLTISLQPED<br>FATYYCQQYDSYLFYFGQGTKLEIR        |
| <b>STE72-8E1</b>  | QVQLQEWGPGGLVQPSSETLSLTCTVSGGSISSGGYWSWIRQ<br>HPGKGLEWIGRIYPSGSTNYNPSLKSRTMSVDTSENQFSL<br>KLSSVTAADTAVYYCARGGPKRSGSPFDVWGQGMVTVSS  | EVVMTQSPSTLSASVGDRVTITCRASQTFGPWLAWYQQKPG<br>QAPKLLIYMASELESVPSRFSGSGSGTEFTLSISLQPED<br>FATYYCQQYNTFSPWTFGQGTKVDIK      |
| <b>STE72-2G4</b>  | QVQLVQSGAEVKKPGASVKVSCASGYTFTSYGISWVRQAP<br>GQGLEWMGWISAYNGNTNYAQKLQGRVTMTTDTSTSTAYME<br>LRSLRSDDTAVYYCARFFYDSSGYSTDYWGQGLTVTVSS   | ETTLTQSPAFMSVTPGDRAILSCRASQSVDSHLAWYHQKPG<br>QPPRLLIYGASTRATGIPARFSGSRSGTEFTLTISLQSED<br>LGVYYCQQYASWPPGYNFGQGTKLEIK    |

|                   |                                                                                                                                                                       |                                                                                                                                                      |
|-------------------|-----------------------------------------------------------------------------------------------------------------------------------------------------------------------|------------------------------------------------------------------------------------------------------------------------------------------------------|
| <b>STE73-2B2</b>  | QVQLVQSGAEVKKPGASVKVSCAS <b>GYTFTGYI</b> MHWVRQAP<br>GQGLEWMGW <b>INPNSGGT</b> NYAQKFQGRVTITRDTASSTAYME<br>LSSLRSED TAVYYC <b>ARVSGWYFGAFDI</b> WGQGMVTVSS            | LPVLTQPHSLSESPGKTVNISCTGS <b>SGSIASNY</b> VQWYQORP<br>GSAPTTVIY <b>EDS</b> HRPSGVPDRFSGSIDSSNSASLSISGLK<br>TEDEADYYC <b>QSYDSSNNQWV</b> FGGGTKLTVL   |
| <b>STE73-2C2</b>  | QVQLVESGGGLVQPGGSLRLS CAAS <b>GITVSSNY</b> MSWVRQAP<br>GKGLEWVSV <b>IYSGGST</b> FYADSVKGRFTISRDN SKNTLYLQ<br>NSLRAEDTGVYYC <b>ARGHDNLDY</b> WGQGLTVTVSS               | LPVLTQPHSVSESPGKTVIISCTGS <b>SDSIASNY</b> VQWYQORP<br>GSAPTTVIY <b>EDN</b> KRPSGVPDRFSGST DSSNSASLTISGLK<br>TEDEAEYYC <b>QSYDSNNHWV</b> FGGGTKLTVL   |
| <b>STE73-2E9</b>  | QVQLVQSGAEVKKPGASVKVSCAS <b>GYTFTSYG</b> ISWVRQAP<br>GQGLEWMGW <b>ISAYNGNT</b> NYAQKLQGRVTMTTDTSTSTAYME<br>LRSLRSDDTAVYYC <b>ARGKFDY</b> WGQGLTVTVSS                  | QSVLTQPPSVSEAPSRVTISCSGS <b>SSNIGNNA</b> VN WYQQLP<br>GKAPKLLIY <b>YDD</b> VLPSGVSDRFSGSKSGTSASLAISGLQSG<br>DEADYYC <b>AAWDDSLSGVV</b> FGGGTKLTVL    |
| <b>STE73-2G8</b>  | QVQLVQSGGGLVKPGGSLRLS CAAS <b>GITVSSNY</b> MSWVRQAP<br>GKGLEWVSI <b>LYSGGTT</b> FYTDSVKGRFTISRDN SKNTLHLQ<br>NSLRAEDTAVYYC <b>ARWSGTYDY</b> WGQGLTVTVSS               | SSELTQDPAVSVALGQTVRITCQGD <b>SLRSYY</b> ASWYQOKPGQ<br>APVLVIY <b>GKN</b> NRPSGIPDRFSGSSSGNTASLTITGAQAEDE<br>ADYYC <b>NSRDSTNDPVL</b> FGAGTKLTVL      |
| <b>STE73-6B10</b> | QVQLVQSGAEVKKPGASVKVSCAS <b>GYTFTSYG</b> ISWVRQAP<br>GQGLEWMGW <b>INPNSGGT</b> NYAQKFQGRVTMTRDTSISTAYME<br>LSRLRSDDTAVYYC <b>ARDRLRYGDSGSYYYYGMDV</b> WGQGTTV<br>TVSS | QSALTQPRSVSGSPGQSVTISCTGT <b>SSDVGGYNY</b> VSWYQQH<br>PGKAPKLLIS <b>EVT</b> RRPSGVPDRFSGSKSGNTASLTVSGLQT<br>EDEADYYC <b>GSYAGSNTWV</b> FGGGTKLTVL    |
| <b>STE73-6C1</b>  | QVQLVQSGGGVVPGRSLRLS CAAS <b>GFTFSSYA</b> MHWVRQAP<br>GKGLEWVAV <b>ISYDGSNK</b> YYADSVKGRFTISRDN SKNTLYLQ<br>MNSLRAEDTAVYYC <b>ARSYVGGMDV</b> WGQGTTVTVSS             | QLVLTQSPSVSGAPGQSVTISCTGT <b>DSNIGAGYN</b> VH WYQQL<br>PGAAPKLIIS <b>YTD</b> NRPSGVPDRFSGSKSGTSASLAITGLQA<br>EDEADYYC <b>QSSDRTL VGSL</b> FGTGTKVTVL |
| <b>STE73-6C8</b>  | QVQLQQSGAEVKKPGSSVKVSCAS <b>GGTFSSYA</b> ISWVRQAP<br>GQGLEWMGR <b>IIPILGIAN</b> Y AQKFQGRVTITADKSTSTAYME<br>LSSLRSED TAVYYC <b>ARSIAALNWFDP</b> WGQGLTVTVSS           | NFMLTQPHSVSESPGKTVTIPCTGS <b>RGSIANNY</b> VQWYRQRP<br>GRAPTTVIF <b>EDN</b> QRPSGVPDRFSGSIDRSSNSASLTISGLE<br>TEDEADYYC <b>QSYDGSNVI</b> FGGGTKLTVL    |
| <b>STE73-9G3</b>  | QVQLQESGGGLVQPGGSLRLS CAAS <b>GFTFSSYA</b> MSWVRQAP<br>GKGLEWVSA <b>ISGSGGST</b> YYADSVKGRFTISRDN SKNTLYLQ<br>MNSLRAEDTAVYYC <b>ARDLVLGSGSSND</b> WGRGTLTVTVSS        | QPVLTQPPSVSGAPGQSVTISCTGT <b>DSNIGAGYN</b> VH WYQQL<br>PGAAPKLIIS <b>YTD</b> NRPSGVPDRFSGSKSGTSASLAITGLQA<br>EDEADYYC <b>QSSDRTL VGSL</b> FGTGTKVTVL |

**Supplementary Figure 5** Flow cytometry inhibition analysis A) Comparison of the inhibition of spike protein and RBD by flow cytometry on ACE2 positive Expi293F cells using 1000 nM scFv-Fc and 50 nM spike protein, respectively RBD (20:1 ratio). B) Inhibition of RBD binding in comparison of Expi293F transiently expressing ACE2 and Calu-3 cells. C) Inhibition of spike S1-S2 binding in comparison of Expi293F transiently expressing ACE2 and Calu-3. As negative control, the antibody SH1351-C1 was used. Data shows single measurements.

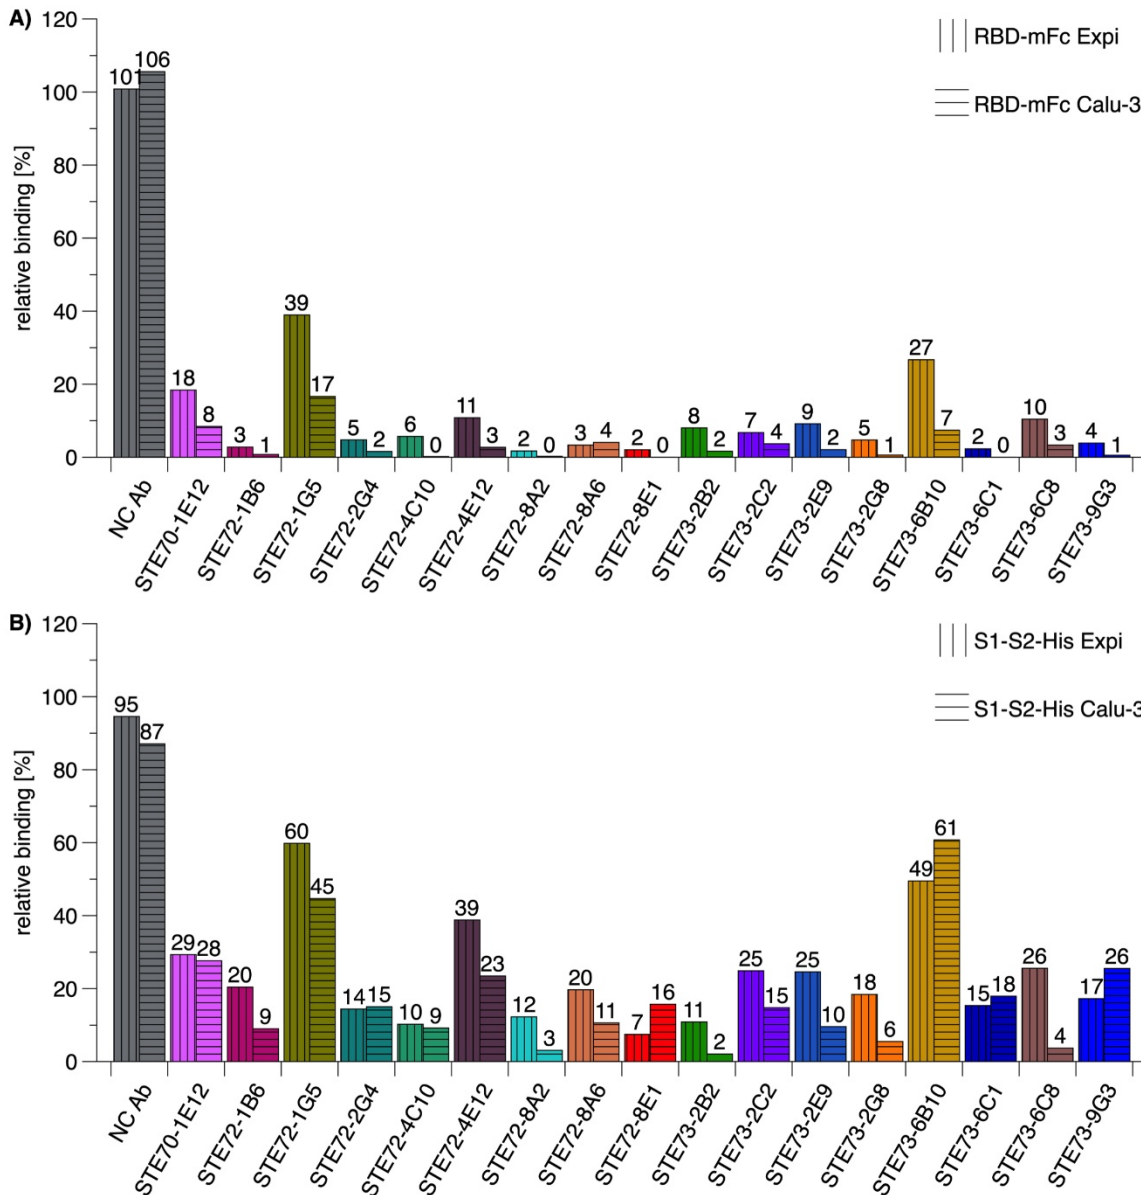





**Supplementary Figure 7** Binding of the IgGs to RBD, S1 and S1-S2 in ELISA. Experiments were performed in duplicate and mean values are given.

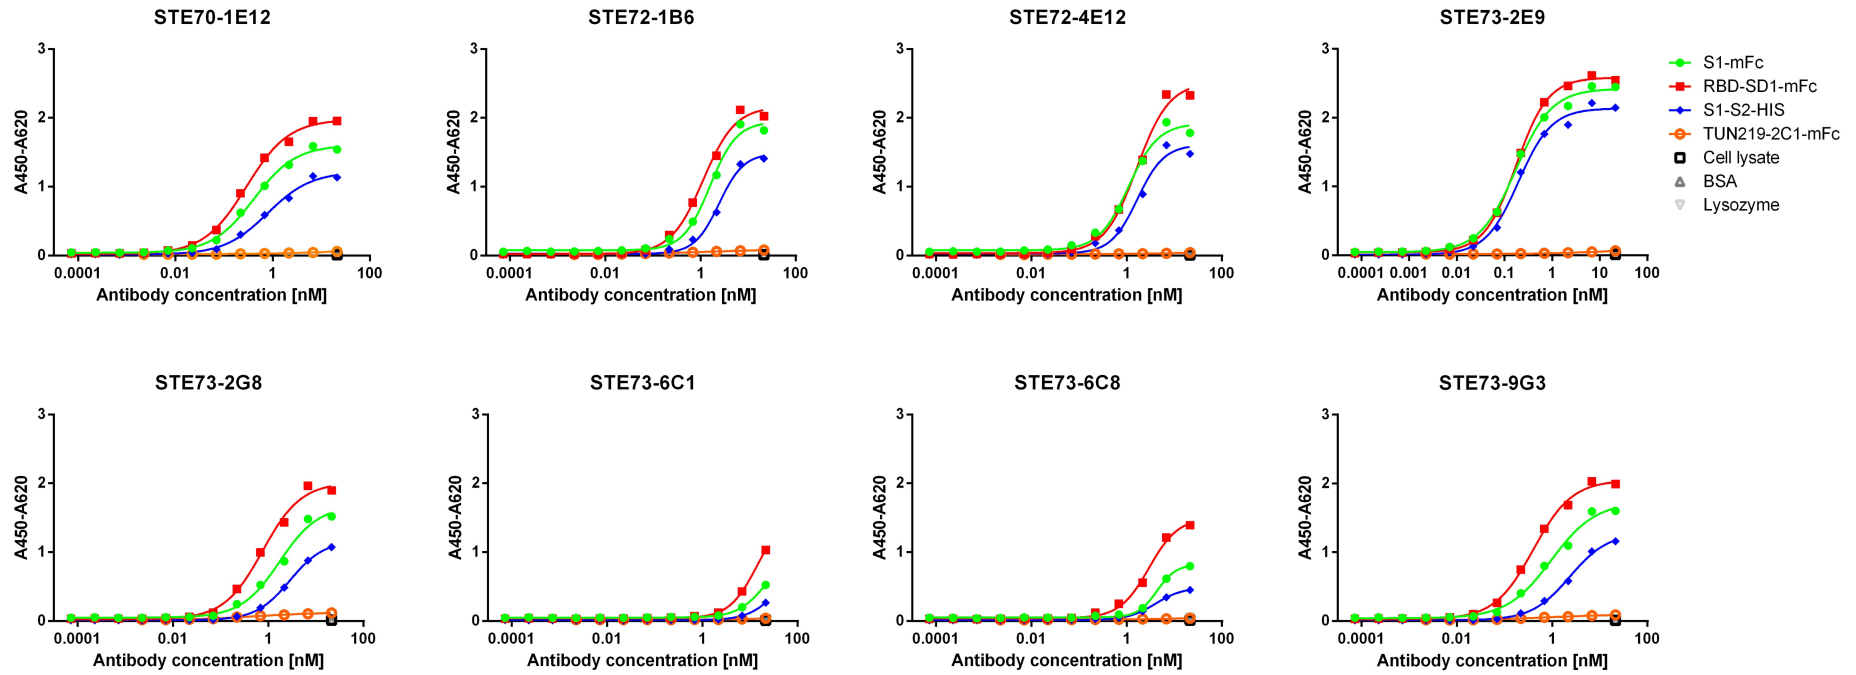

**Supplementary Figure 8** Computational models of the antibodies (colored cartoon) on the spike trimer (surface, each monomer is in a different shade of grey). Only the variable region of the antibodies is shown.

### STE73-2E9

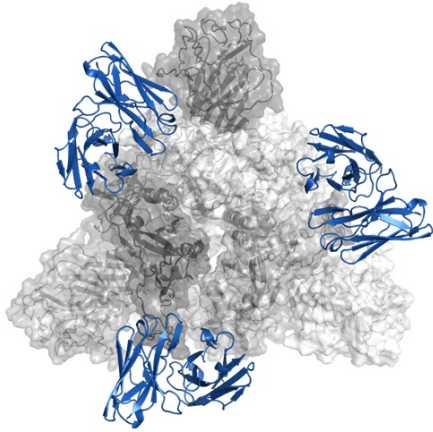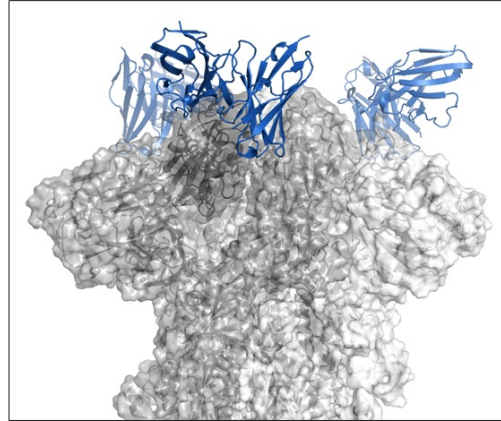

### STE73-2G8

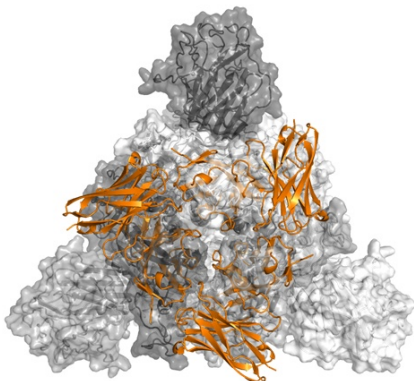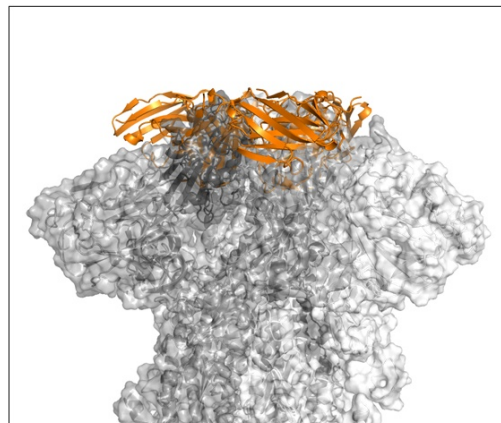

### STE73-9G3

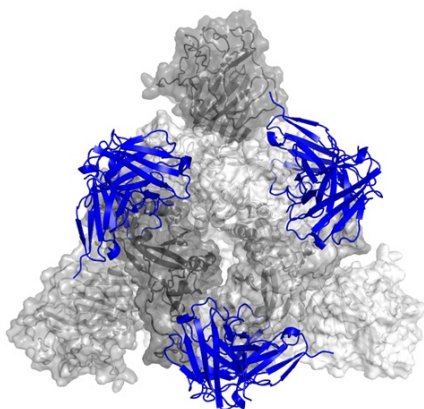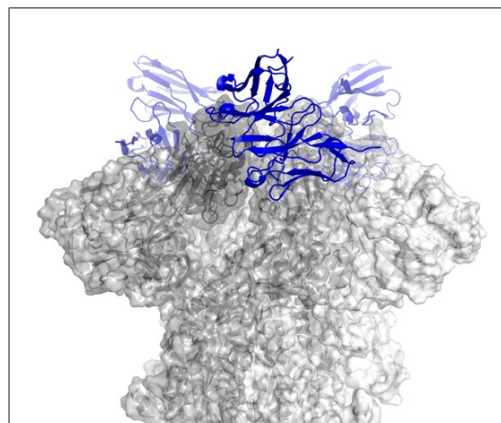

**Supplementary Figure 9** SEC analysis of STE73-2E9 IgG under normal conditions (4°C, PBS, pH7.4), heat stress conditions (45°C for 24 h, PBS, pH7.4) and pH stress (4°C, 100 mM Na Acetate, pH3 for 24 h). Data shows a representative of two experiment.

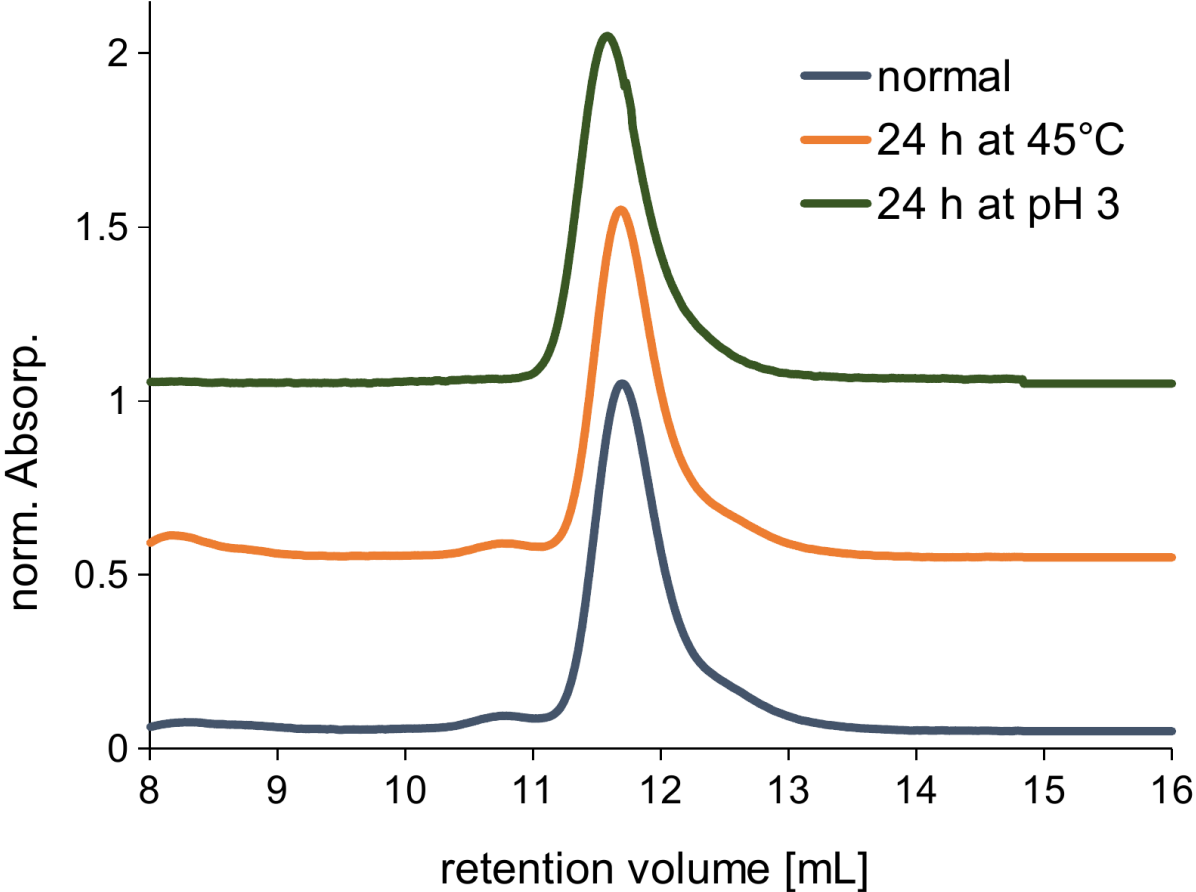

## Supplementary Table 1 Overview oligonucleotide primers used in this study

| <b>primer name</b>         | <b>sequence (5' &gt; 3')</b>     | <b>application</b>                   |
|----------------------------|----------------------------------|--------------------------------------|
| MBL-NcoI-RBD 32kDa_f       | attaccatggccccgggtgcagcccac      | cloning of RBD-SD1 and RBD-25        |
| RBD-SD1-Not-rev            | taatgcgcccgctgcaaggggtgatg       | cloning of RBD-SD1                   |
| GiR-RBD25kDa-NotI_r        | taatgcgcccggaagttcacgcatttgtcttc | cloning of RBD-25                    |
| Nco-S1-for                 | cattaccatggcccagtgctgaacc        | cloning of S1 and S1-S2              |
| S1-Not-rev (with furin)    | ataatgcgcccgcgcgcgcgctgtgg       | cloning of S1 with Furin             |
| S1-Not-rev (without furin) | tggcgcccgcgacgcagagccggggtgttct  | cloning of S1 without Furin          |
| S1-S2-Not-rev              | gcacgcgccgcccctgttcatacttc       | cloning of S1-S2                     |
| Nco-ACE-for                | gcgtgccatggcccagtcaccattgaggaac  | cloning of ACE2                      |
| ACE-extracell-Not-rev      | cgcacgcgcccggaacagggggctgg       | cloning of ACE2 extracellular domain |
| ACE-fulllength-Not-rev     | cgcacgcgccgcaaaggaggtctgaac      | cloning of ACE2 fulllength           |
| V367F-for                  | ctactcctctgtacaactccgcagcttc     | insertion of mutation V367F          |
| V367F-rev                  | gtacaggaaggagtagtcggccacgcaattgc | insertion of mutation V367F          |
| V483A-for                  | cggcgcggaaggctcaactgctac         | insertion of mutation V483A          |
| V483A-rev                  | cttcgcgccgttacaaggggtgc          | insertion of mutation V483A          |
| G476S-for                  | ggccagcagcacccttgaacggc          | insertion of mutation G476S          |
| G476S-rev                  | gctgctggcctgatagatctcggtggag     | insertion of mutation G476S          |
| N439K-for                  | cagcaagaacctggactcaaagtgcggcg    | insertion of mutation N439K          |
| N439K-rev                  | ccaggttctgtgtccaggcaatcacacagc   | insertion of mutation N439K          |
| E484K-for                  | gcgtgaaaggctcaactgctacttccc      | insertion of mutation E484K          |
| E484K-rev                  | gcctttcacgcccgttacaaggggtg       | insertion of mutation E484K          |
| F486V-for                  | gaaggcgtcaactgctacttcccactgc     | insertion of mutation F486V          |
| F486V-rev                  | agttgacgcctccacgcccgttacaagg     | insertion of mutation F486V          |
| G485R-for                  | gtggaacgctcaactgctacttcccactgc   | insertion of mutation G485R          |
| G485R-rev                  | gaagcgttccacgcccgttacaagggg      | insertion of mutation G485R          |
| OpiE2_for                  | cgcttatcgccctataaatac            | sequencing of OpiE2 vector forward   |
| IE1-rev                    | caaaacccacaccaacaac              | sequencing of OpiE2 vector reverse   |
| ACE-seq-for                | ccatgctaacggaccagg               | internal sequencing of ACE2          |
| S1Spike-seq-int-FBE-f      | ccgaatccatcgtagcttcc             | internal sequencing of S1            |
| S1+S2-int-S2-seq_F         | gtggccagccagagcatcattgc          | internal sequencing of S1-S2         |

|                     |                                         |                                                                                                                                                               |
|---------------------|-----------------------------------------|---------------------------------------------------------------------------------------------------------------------------------------------------------------|
| ABC2                | gtaacgtctctcagccaggtacagctgcagc         | VH_f for cloning into pCSEHh1c.2 (STE73-6C8)                                                                                                                  |
| ABC4                | gtaacgtctctcagccaggtgcaactgcagg         | VH_f for cloning into pCSEHh1c.2 (STE73-9G3)                                                                                                                  |
| ABC5                | gtaacgtctctcagccaggtgcagctggtg          | VH_f for cloning into pCSEHh1c.2 (STE72-4E12)                                                                                                                 |
| ABC8                | gtaacgtctctcagccaggtccagctggtg          | VH_f for cloning into pCSEHh1c.2 (STE73-2E9, STE73-6B10, STE73-6C1)                                                                                           |
| ABC23               | gtaacgtctctcggttctctgagctgactcagg       | VLA_f for cloning into pCSL3hl.2 (STE73-2G8)                                                                                                                  |
| ABC28               | gtaacgtctctcggtcagcttgctgactcaatc       | VLA_f for cloning into pCSL3hl.2 (STE73-6C1)                                                                                                                  |
| ABC34               | tcctcgtctcagacctaggacggtgaccttg         | VLA_r for cloning into pCSL3hl.2 (STE73-6C1, STE73-9G3)                                                                                                       |
| ABC35               | tcctcgtctcagacctaggacggtcagcttg         | VLA_r for cloning into pCSL3hl.2 (STE73-2E9, STE73-2G8, STE73-6B10)                                                                                           |
| ABC40               | gtaacgtctctcagccaggtcagctggtgc          | VH_f for cloning into pCSEHh1c.2 (STE72-8A6, STE72-8A2)                                                                                                       |
| ABC41               | gtaacgtctctcggtcagcctgtgctgactcag       | VLA_f for cloning into pCSL3hl.2 (STE73-9G3)                                                                                                                  |
| ABC57               | gtaacgtctctcggtcagctctgctgactcagc       | VLA_f for cloning into pCSL3hl.2 (STE73-2E9)                                                                                                                  |
| ABC59               | gtaacgtctctcggtcagctctgccctgactcag      | VLA_f for cloning into pCSL3hl.2 (STE73-6B10)                                                                                                                 |
|                     |                                         | VH_r for cloning into pCSEHh1c.2 (STE70-1E12, STE72-8A6, STE72-8A2, STE72-4E12, STE72-1B6, STE73-2E9, STE73-2G8, STE73-6B10, STE73-6C1, STE73-6C8, STE73-9G3) |
| ABC61               | tcctcgtctcatagctgaggatacggtgacc         |                                                                                                                                                               |
| ABC63               | gtaacgtctctcggtgaaacgacactcacgcagtc     | VLk_f for cloning into pCSL3hk.2 (STE72-4E12)                                                                                                                 |
| ABC64               | gtaacgtctctcggtgatattgtgatgacacagctctcc | VLk_f for cloning into pCSL3hk.2 (STE72-1B6)                                                                                                                  |
| ABC67               | tcctcgtctcatagctttgattccaccttg          | VLk_r for cloning into pCSL3hk.2 (STE72-4E12)                                                                                                                 |
| ABC76               | gtaacgtctctcggtgacatcgtgatgaccagtc      | VLk_f for cloning into pCSL3hk.2 (STE72-8A6)                                                                                                                  |
| ABC107              | tcctcgtctcatagctttgatctccaccttg         | VLk_r for cloning into pCSL3hk.2 (STE72-8A2, STE72-1B6)                                                                                                       |
| ABC110              | tcctcgtctcatagctttgatctccagcttg         | VLk_r for cloning into pCSL3hk.2 (STE72-8A6)                                                                                                                  |
| ABC113              | tcctcgtctcagacctaggacggtcagtttg         | VLA_r for cloning into pCSL3hl.2 (STE70-1E12, STE73-6C8)                                                                                                      |
| GG_STE70-1E12_VH_f  | gtaacgtctctcagccagatgcagctggtac         | VH_f for cloning into pCSEHh1c.2 (STE70-1E12)                                                                                                                 |
| GG_STE70-1E12_VLI_f | gtaacgtctctcggtaattttatgctgactcagc      | VLA_f for cloning into pCSL3hl.2 (STE70-1E12)                                                                                                                 |
| GG_STE72-8A2_VLk_f  | gtaacgtctctcggtgacatccggtgaccag         | VLk_f for cloning into pCSL3hk.2 (STE72-8A2)                                                                                                                  |
| GG_STE73-2G8_VH_f   | gtaacgtctctcagccaggtccagctggtacaatc     | VH_f for cloning into pCSEHh1c.2 (STE73-2G8)                                                                                                                  |
| GG_STE73-6C8_VLI_f  | gtaacgtctctcggtaattttatgctgactcaac      | VLA_f for cloning into pCSL3hl.2 (STE73-6C8)                                                                                                                  |
| GG_STE72-1B6_VH_f   | gtaacgtctctcagccaggtgaagctggtacagtc     | VH_f for cloning into pCSEHh1c.2 (STE72-1B6)                                                                                                                  |
